# Supplementary material for: First trimester plasma microRNAs levels predict Matsuda Index-estimated insulin sensitivity between 24th and 29th week of pregnancy
Source: PubMed Central journal article supplement — BMJ Open Diabetes Res Care. 2022 Mar 4;10(2):e002703. doi: 10.1136/bmjdrc-2021-002703 (PMC8900031; doi:10.1136/bmjdrc-2021-002703), 2022-03-04
Supplement: bmjdrc-2021-002703supp001.pdf [file bmjdrc-2021-002703supp001.pdf]

1 **Supplementary table 1: List of miRNAs associated with Matsuda Index.**

| miRNA                                           | miRNA detection rate (%) <sup>*</sup> | DESeq2 normalised reads count (Mean ± SD) | Fold change <sup>†</sup> | p-value  | FDR q-value |
|-------------------------------------------------|---------------------------------------|-------------------------------------------|--------------------------|----------|-------------|
| hsa-miR-215-5p                                  | 100.00                                | 565.91 ± 873.79                           | 1.438                    | 3.00E-07 | 0.0003      |
| hsa-miR-141-3p                                  | 100.00                                | 148.99 ± 243.87                           | 1.397                    | 1.75E-06 | 0.0009      |
| hsa-miR-200a-3p                                 | 98.84                                 | 29.72 ± 45.27                             | 1.377                    | 7.95E-06 | 0.0026      |
| hsa-miR-143-3p                                  | 100.00                                | 31189.82 ± 14152.42                       | 1.186                    | 1.65E-05 | 0.0027      |
| hsa-miR-221-3p                                  | 100.00                                | 8831.48 ± 2788.77                         | 0.892                    | 1.45E-05 | 0.0027      |
| hsa-miR-205-5p                                  | 100.00                                | 59.06 ± 56.65                             | 1.345                    | 1.42E-05 | 0.0027      |
| hsa-miR-520a-3p <sup>*</sup>                    | 99.07                                 | 87.85 ± 104.45                            | 1.400                    | 2.30E-05 | 0.0033      |
| hsa-miR-519d-5p <sup>*</sup>                    | 70.37                                 | 6.17 ± 7.14                               | 1.529                    | 3.14E-05 | 0.0035      |
| hsa-miR-429                                     | 93.75                                 | 13.67 ± 17.37                             | 1.364                    | 2.95E-05 | 0.0035      |
| hsa-miR-489-3p                                  | 33.10                                 | 1.44 ± 2.13                               | 1.776                    | 5.26E-05 | 0.0049      |
| hsa-miR-218-5p                                  | 63.43                                 | 5.84 ± 14.21                              | 1.679                    | 5.50E-05 | 0.0049      |
| hsa-miR-483-5p                                  | 98.84                                 | 36.82 ± 33.10                             | 1.317                    | 7.54E-05 | 0.0062      |
| hsa-miR-1323 <sup>*</sup>                       | 99.54                                 | 147.88 ± 162.88                           | 1.363                    | 8.91E-05 | 0.0063      |
| hsa-miR-3183                                    | 36.34                                 | 1.45 ± 2.35                               | 0.609                    | 8.57E-05 | 0.0063      |
| hsa-miR-516b-5p <sup>*</sup>                    | 98.84                                 | 102.28 ± 98.62                            | 1.335                    | 0.0001   | 0.0098      |
| hsa-miR-582-3p                                  | 96.06                                 | 20.95 ± 25.59                             | 1.310                    | 0.0002   | 0.0143      |
| hsa-miR-512-3p <sup>*</sup>                     | 100.00                                | 290.64 ± 385.19                           | 1.332                    | 0.0003   | 0.0144      |
| hsa-miR-515-5p <sup>*</sup>                     | 83.80                                 | 10.57 ± 13.01                             | 1.377                    | 0.0003   | 0.0144      |
| hsa-miR-4772-5p                                 | 83.10                                 | 8.16 ± 16.38                              | 1.415                    | 0.0003   | 0.0144      |
| hsa-miR-582-5p                                  | 67.82                                 | 5.64 ± 15.35                              | 1.477                    | 0.0003   | 0.0144      |
| hsa-miR-516a-5p <sup>*</sup>                    | 95.37                                 | 31.43 ± 34.78                             | 1.340                    | 0.0003   | 0.0145      |
| hsa-miR-519c-3p <sup>*</sup>                    | 84.95                                 | 11.21 ± 13.04                             | 1.370                    | 0.0003   | 0.0145      |
| hsa-miR-16-1-3p                                 | 59.03                                 | 3.01 ± 3.47                               | 1.459                    | 0.0003   | 0.0145      |
| hsa-miR-10b-5p                                  | 100.00                                | 29056.66 ± 22897.46                       | 1.238                    | 0.0004   | 0.0159      |
| hsa-miR-1283 <sup>*</sup>                       | 97.92                                 | 57.65 ± 60.61                             | 1.325                    | 0.0004   | 0.0164      |
| hsa-miR-877-5p                                  | 100.00                                | 1080.68 ± 419.18                          | 0.885                    | 0.0005   | 0.0174      |
| hsa-miR-375                                     | 100.00                                | 1975.18 ± 4693.83                         | 1.327                    | 0.0006   | 0.0214      |
| hsa-miR-130a-3p                                 | 100.00                                | 5555.63 ± 1568.63                         | 0.921                    | 0.0006   | 0.0219      |
| hsa-let-7b-3p                                   | 100.00                                | 60.00 ± 25.79                             | 1.132                    | 0.0007   | 0.0227      |
| hsa-miR-517a-3p<br>hsa-miR-517b-3p <sup>*</sup> | 93.29                                 | 20.36 ± 25.26                             | 1.332                    | 0.0007   | 0.0227      |
| hsa-miR-2116-3p                                 | 85.19                                 | 6.51 ± 6.14                               | 1.288                    | 0.0007   | 0.0227      |
| hsa-miR-517-5p <sup>*</sup>                     | 89.81                                 | 17.00 ± 19.63                             | 1.338                    | 0.0010   | 0.0306      |
| hsa-miR-520d-3p <sup>*</sup>                    | 84.95                                 | 9.93 ± 11.48                              | 1.363                    | 0.0011   | 0.0320      |
| hsa-miR-518e-3p <sup>*</sup>                    | 78.94                                 | 8.07 ± 9.38                               | 1.341                    | 0.0013   | 0.0366      |
| hsa-miR-873-5p                                  | 96.53                                 | 23.57 ± 23.62                             | 1.296                    | 0.0013   | 0.0367      |

|                                                                                                |        |                |       |        |        |
|------------------------------------------------------------------------------------------------|--------|----------------|-------|--------|--------|
| hsa-miR-518e-5p hsa-miR-519a-5p hsa-miR-519b-5p hsa-miR-519c-5p hsa-miR-522-5p hsa-miR-523-5p* | 98.38  | 44.49 ± 46.68  | 1.274 | 0.0014 | 0.0398 |
| hsa-miR-338-3p                                                                                 | 100.00 | 108.42 ± 36.66 | 1.096 | 0.0015 | 0.0398 |
| hsa-miR-100-5p                                                                                 | 100.00 | 105.34 ± 86.12 | 1.223 | 0.0018 | 0.0460 |
| hsa-miR-524-3p*                                                                                | 55.56  | 3.49 ± 4.93    | 1.442 | 0.0020 | 0.0496 |

2 \* C19MC miRNAs. A miRNA was considered detected at  $\geq 1$  raw read count. † Fold changes  
 3 represent the change in miRNA abundance at first trimester of pregnancy for each increase of  
 4 one ln transformed arbitrary unit of insulin sensitivity estimated using the Matsuda index at  
 5 second trimester of pregnancy. Abbreviations: FDR: false discovery rate, p-value: unadjusted p-  
 6 value, FDR q-value: p-value adjusted for FDR, SD: standard deviation.

7

8
