# Supplementary material for: First trimester plasma microRNAs levels predict Matsuda Index-estimated insulin sensitivity between 24th and 29th week of pregnancy
Source: PubMed Central journal article supplement — BMJ Open Diabetes Res Care. 2022 Mar 4;10(2):e002703. doi: 10.1136/bmjdrc-2021-002703 (PMC8900031; doi:10.1136/bmjdrc-2021-002703), 2022-03-04
Supplement: bmjdrc-2021-002703supp002.pdf [file bmjdrc-2021-002703supp002.pdf]

Supplementary table 2: Linear regression analysis of miRNAs interactions

|                         | <b>has-miR-141-3p</b> | hsa-miR-143-3p | hsa-miR-221-3p | hsa-miR-519d-5p* | hsa-miR-489-3p | hsa-miR-218-5p | hsa-miR-483-5p | hsa-miR-3183 | <b>hsa-miR-512-3p*</b> | <b>hsa-miR-516a-5p*</b> | hsa-miR-16-1-3p | <b>hsa-miR-375</b> | hsa-miR-130a-3p | hsa-let-7b-3p | hsa-miR-2116-3p | <b>hsa-miR-517-5p*</b> | hsa-miR-873-5p | hsa-miR-338-3p |
|-------------------------|-----------------------|----------------|----------------|------------------|----------------|----------------|----------------|--------------|------------------------|-------------------------|-----------------|--------------------|-----------------|---------------|-----------------|------------------------|----------------|----------------|
| <b>has-miR-141-3p</b>   |                       |                |                |                  |                |                |                |              |                        |                         |                 |                    |                 |               |                 |                        |                |                |
| hsa-miR-143-3p          | p=0.0005              |                |                |                  |                |                |                |              |                        |                         |                 |                    |                 |               |                 |                        |                |                |
| hsa-miR-221-3p          |                       |                |                |                  |                |                |                |              |                        |                         |                 |                    |                 |               |                 |                        |                |                |
| hsa-miR-519d-5p*        |                       |                |                |                  |                |                |                |              |                        |                         |                 |                    |                 |               |                 |                        |                |                |
| hsa-miR-489-3p          |                       |                |                |                  |                |                |                |              |                        |                         |                 |                    |                 |               |                 |                        |                |                |
| hsa-miR-218-5p          |                       |                |                |                  |                |                |                |              |                        |                         |                 |                    |                 |               |                 |                        |                |                |
| hsa-miR-483-5p          |                       |                |                |                  |                |                |                |              |                        |                         |                 |                    |                 |               |                 |                        |                |                |
| hsa-miR-3183            |                       |                |                |                  |                |                |                |              |                        |                         |                 |                    |                 |               |                 |                        |                |                |
| <b>hsa-miR-512-3p*</b>  | p=0.00007             | p=0.0001       |                |                  | p=0.0005       |                | p=0.0001       |              |                        |                         |                 |                    |                 |               |                 |                        |                |                |
| <b>hsa-miR-516a-5p*</b> |                       |                |                |                  |                |                |                |              | p=0.0003               |                         |                 |                    |                 |               |                 |                        |                |                |
| hsa-miR-16-1-3p         |                       |                |                |                  |                |                |                |              |                        |                         |                 |                    |                 |               |                 |                        |                |                |
| <b>hsa-miR-375</b>      |                       |                |                |                  |                |                |                |              | p=0.0001               |                         |                 |                    |                 |               |                 |                        |                |                |
| hsa-miR-130a-3p         |                       |                |                |                  |                |                |                |              |                        |                         |                 |                    |                 |               |                 |                        |                |                |
| hsa-let-7b-3p           |                       |                |                |                  |                |                |                |              |                        |                         |                 |                    |                 |               |                 |                        |                |                |
| hsa-miR-2116-3p         |                       |                |                |                  |                |                |                |              |                        |                         |                 |                    |                 |               |                 |                        |                |                |
| <b>hsa-miR-517-5p*</b>  |                       | p=0.0005       |                |                  |                |                |                |              | p=0.0002               |                         |                 |                    |                 |               |                 |                        |                |                |
| hsa-miR-873-5p          |                       |                |                |                  |                |                |                |              |                        |                         |                 |                    |                 |               |                 |                        |                |                |
| hsa-miR-338-3p          |                       |                |                |                  |                |                |                |              |                        |                         |                 |                    |                 |               |                 |                        |                |                |

\* C19MC miRNAs, p= p-value of the interaction term. MiRNAs in bold represent miRNAs with an inverse association with IS in the DESeq2 model and the lasso model.
